# Supplementary material
Source: publisher figshare collection journal article supplement (https://aacr.figshare.com/articles/dataset/_/22425364)

# Supplementary Figure 7

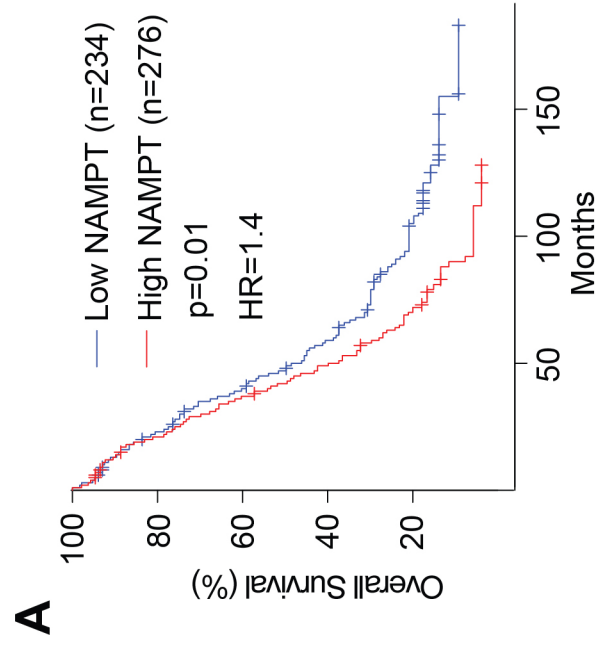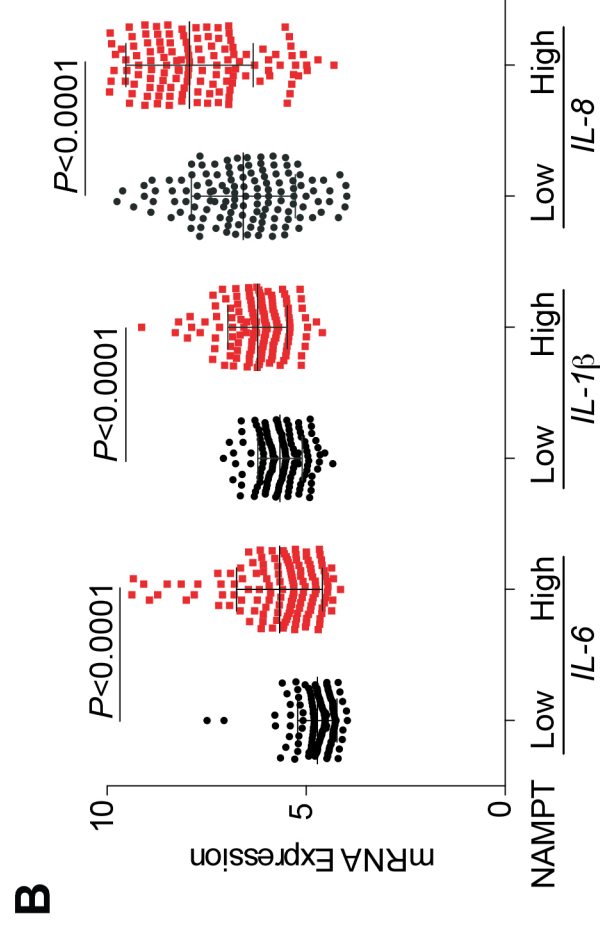

Supplement: Supplementary file 1 [file 39871579]
